# Supplementary material for: A Global Analysis of Associations between Fine Particle Air Pollution and Cardiovascular Risk Factors: Feasibility Study on Data Linkage
Source: PubMed Central journal article supplement (PMC7427684; doi:10.5334/gh.877), 2020-08-06
Supplement: gh-15-1-877-s1.pdf [file gh-15-1-877-s1.pdf]

## Supplements

Table A. Missing data in SURF

| Variables                      | No. of Missing | Imputed in analysis |
|--------------------------------|----------------|---------------------|
| Country                        | 0              | No                  |
| Centre                         | 0              | No                  |
| Age                            | 0              | No                  |
| Sex                            | 0              | No                  |
| PM2.5                          | 0              | No                  |
| Smoking                        | 84             | Yes                 |
| Systolic blood pressure (SBP)  | 93             | Yes                 |
| Diastolic blood pressure (DBP) | 95             | Yes                 |
| Exercise                       | 127            | Yes                 |
| Weight                         | 227            | Yes                 |
| Height                         | 357            | Yes                 |
| Total cholesterol (TC)         | 760            | Yes                 |
| Low-density lipoprotein (LDL)  | 1254           | Yes                 |
| High-density lipoprotein (HDL) | 1139           | Yes                 |
| Glucose                        | 1093           | Yes                 |
