# Supplementary material for: A Global Analysis of Associations between Fine Particle Air Pollution and Cardiovascular Risk Factors: Feasibility Study on Data Linkage
Source: PubMed Central journal article supplement (PMC7427684; doi:10.5334/gh.877), 2020-08-06
Supplement: gh-15-1-877-s3.pdf [file gh-15-1-877-s3.pdf]

Table C. Risk factors, stratified by centres

|              | SBP<br>(mmHg) | DBP<br>(mmHg) | TC<br>(mmol/L) | LDL<br>(mmol/L) | HDL<br>(mmol/L) | Glucose<br>(mmol/L) |
|--------------|---------------|---------------|----------------|-----------------|-----------------|---------------------|
| Croatia 1    | 127.6±18.1    | 76.7±9.1      | 5.2±1.5        | 2.5±1.2         | 1.1±0.4         | 7.4±3.1             |
| Croatia 2    | 132.2±15.0    | 80.6±8.7      | 4.5±1.1        | 2.7±1.0         | 1.3±0.4         | 6.6±2.0             |
| Croatia 3    | 141.0±26.5    | 79.6±14.7     | 5.2 ±1.5       | 3.3±1.2         | 1.1±0.4         | 8.0±3.5             |
| Croatia 4    | 131.4±20.1    | 79.4±10.6     | 5.2±1.0        | 3.0±1.2         | 1.3±0.4         | 6.3±1.6             |
| Croatia 5    | 131.8±18.5    | 77.9±10.5     | 4.3±1.3        | 2.5 ±1.1        | 1.1±0.3         | 6.6±2.4             |
| Croatia 6    | 137.2±21.8    | 82.4±12.5     | 5.2±1.4        | 3.2±1.2         | 1.2±0.4         | 7.1±2.5             |
| Croatia 7    | 131.8±19.5    | 79.1±10.8     | 4.7±1.5        | 2.9±1.2         | 1.2±0.4         | 6.4±2.0             |
| Croatia 8    | 128.2±22.7    | 77.3±13.9     | 3.5±2.8        | 2.1±1.7         | 1.6±0.5         | 5.8±3.2             |
| Croatia 9    | 136.5±21.6    | 80.9±12.2     | 4.5±1.8        | 2.6±1.5         | 0.9±0.5         | 7.2±3.7             |
| Ireland 1    | 128.9±15.8    | 73.2±9.3      | 3.6±0.8        | 1.8±0.6         | 1.2±0.3         | 5.7±1.3             |
| Ireland 2    | 126.8±16.8    | 74.1±8.0      | 3.9±1.0        | 2.0±0.8         | 1.2±0.4         | 5.4±1.1             |
| Ireland 3    | 134.4±17.2    | 75.3±9.2      | 3.7±0.8        | 1.9±0.7         | 1.2±0.3         | 5.6±1.0             |
| Ireland 4    | 130.0±14.7    | 72.1±9.3      | 3.5±0.8        | 1.8±0.7         | 1.3±0.3         | 5.4±0.6             |
| Ireland 5    | 134.7±14.8    | 74.2±12.5     | 4.5±1.2        | 2.5±1.1         | 1.2±0.3         | 5.6±1.0             |
| Ireland 6    | 137.1±24.6    | 78.1±10.5     | 3.8±1.1        | 1.9±0.8         | 1.2±0.4         | 5.7±1.1             |
| Ireland 7    | 123.9±12.5    | 74.1±10.1     | 4.1±1.2        | 2.3±1.0         | 1.2±0.4         | 6.8±2.8             |
| Ireland 8    | 137.3±19.0    | 74.7±9.8      | 4.2±1.1        | 2.3±0.9         | 1.3±0.4         | 5.6±1.1             |
| Ireland 9    | 126.8±15.4    | 75.3±14.0     | 3.9±0.7        | 2.3±0.6         | 1.1±0.2         | 5.7±0.7             |
| Ireland 10   | 136.2±18.6    | 74.0±10.0     | 4.1±1.1        | 2.2±0.8         | 1.2±0.4         | 5.9±1.6             |
| Ireland 11   | 139.1±28.2    | 76.4±14.1     | 4.1±1.0        | 2.0±0.8         | 1.2±0.2         | 5.4±0.7             |
| Italy 1      | 132.4±12.2    | 79.0±7.7      | 4.3±1.1        | 2.5±0.8         | 1.1±0.3         | NA                  |
| Italy 2      | 140.7±21.2    | 82.6±10.7     | 4.3±1.0        | 2.3±0.7         | 1.3±0.4         | 5.8±1.4             |
| Italy 3      | 121.2±13.5    | 68.8±6.8      | 3.3±1.6        | 1.8±1.2         | 0.8±0.2         | 5.6±1.3             |
| Italy 4      | 144.7±24.2    | 80.4±10.8     | 4.1±1.1        | 2.2±0.8         | 1.1±0.3         | 6.2±1.2             |
| Italy 5      | 121.4±8.8     | 75.5±6.4      | 4.1±1.0        | 2.2±0.7         | 1.3±0.5         | 6.0±1.5             |
| Italy 6      | 125.2±13.2    | 70.9±8.1      | 3.9±0.9        | 2.1±0.7         | 1.1±0.3         | 5.6±1.4             |
| Italy 7      | 132.0±19.6    | 76.6±9.3      | 3.6±0.9        | 2.1±1.2         | 1.5±0.7         | 6.5±1.3             |
| Italy 8      | 119.8±13.0    | 75 ±6.3       | 3.5±0.8        | 2.1±0.5         | NA              | 7.4±3.4             |
| Italy 9      | 145.4±26.8    | 79.9±8.2      | 4.2±1.0        | 2.0±0.6         | 1.2±0.4         | 6.1±1.4             |
| Italy 10     | 124.7±16.1    | 78.8±6.0      | 3.8±0.9        | 2.1±0.7         | 1.1±0.3         | 6.3±1.9             |
| Italy 11     | 124.3±13.9    | 75.1±7.6      | 8.4±6.0        | 3.2±1.5         | 1.1±0.2         | 6.2±1.9             |
| Italy 12     | 122.6±20.6    | 75.0±8.9      | 4.3±1.6        | 2.3±0.8         | 1.1±0.3         | 6.3±1.9             |
| Italy 13     | 129.8±17.1    | 74.8±10.2     | 4.3±0.8        | 2.4±0.6         | 1.2±0.3         | 6.2±1.4             |
| Italy 14     | 132.5±18.0    | 80.2±9.1      | 4.2±0.8        | 3.4±1.6         | 1.3±0.4         | 6.3±1.0             |
| Denmark<br>1 | 131.0±19.4    | 76.0±10.4     | 4.1±0.9        | 2.1±0.8         | 1.2±0.4         | 6.4±2.4             |
| UK 1         | 123.8±15.3    | 72.5±7.2      | 3.9±0.8        | 1.9±0.6         | 1.1±0.3         | 6.7±3.3             |
| UK 2         | 118.0±15.1    | 68.9±8.9      | 3.8±0.7        | 1.9±0.7         | 1.2±0.4         | 5.9±1.2             |
| KSA 1        | 129.2±17.5    | 70.1±10.5     | 4.0±1.0        | 2.3±0.8         | 1.0±0.3         | 8.1±3.9             |
| KSA 2        | 127.2±21.1    | 68.0±10.9     | 4.5±1.5        | 2.7±1.2         | 1.3±0.6         | 6.9±4.1             |
| KSA 3        | 135.2±20.1    | 75.2±11.2     | 4.2±1.1        | 2.1±0.7         | 1.1±0.2         | 9.5±4.8             |
| KSA 4        | 128.2±18.9    | 71.6±10.6     | 3.9±1.0        | 2.2±0.7         | 1.0±0.3         | 7.9±3.2             |
| Romania 1    | 133.2±21.5    | 80.4 ±12.4    | 4.4±1.0        | 2.6±1.0         | 1.2±0.3         | 6.7±2.4             |
| Romania 2    | 127.0±23.6    | 75.3±7.2      | 2.2±1.6        | NA              | 0.5±0.5         | 4.2±1.4             |
| Romania 3    | 136.7±26.2    | 81.3±13.7     | 4.5±1.4        | NA              | NA              | 6.6±1.7             |
| Romania 4    | 133.1±18.1    | 77.2±10.1     | 3.7±1.8        | 2.0±1.3         | 0.9±0.4         | 5.7±2.2             |
| Romania 5    | 145.4±28.7    | 80.2±13.0     | 5.1±1.2        | 3.4±1.1         | 1.2±0.5         | 6.6±2.2             |
| Romania 6    | 128.3±28.7    | 77.4±13.8     | 9.7±2.1        | 6.3±1.1         | 1.9±0.4         | 8.2±3.9             |

|           | SBP<br>(mmHg) | DBP<br>(mmHg) | TC<br>(mmol/L) | LDL<br>(mmol/L) | HDL<br>(mmol/L) | Glucose<br>(mmol/L) |
|-----------|---------------|---------------|----------------|-----------------|-----------------|---------------------|
| Romania 7 | 157.0±22.7    | 91.7±14.1     | 5.0±3.0        | 3.0±1.0         | 1.0±0.2         | 6.6±2.1             |
| Russia 1  | 132.1±15.1    | 82.7±9.8      | 5.8±1.2        | 3.1±0.9         | 1.2±0.4         | 6.1±0.8             |
| Russia 2  | 130.5±15.4    | 80.3±8.4      | 5.5±0.3        | 1.8±0.3         | 1.3±0.1         | 3.7±1.3             |
| Russia 3  | 129.6±10.7    | 78.5±6.1      | 5.7±1.7        | 3.8±1.4         | 1.1±0.3         | 5.4±0.9             |
| Russia 4  | 128.5±17.0    | 80.3±10.2     | 4.4±0.9        | 1.8±0.4         | 1.1±0.4         | 5.2±1.2             |
| Russia 5  | 124.1±11.4    | 78.2±6.5      | 4.6±0.9        | 3.2±0.6         | 1.0±0.2         | 5.9±1.1             |
| Russia 6  | 132.0±14.2    | 80.3±10.9     | 5.1±0.9        | 3.1±0.9         | 1.2±0.2         | 5.6±1.2             |
| Russia 7  | 129.0±13.4    | 78.9±7.5      | 5.0±1.1        | 3.8±1.7         | 1.3±0.2         | 5.6±0.9             |
| Russia 8  | 128.6±16.5    | 80.4±12.2     | 5.1±1.1        | 2.7±1.3         | 1.3±0.5         | 5.7±1.4             |
| Taiwan 1  | 136.6±21.9    | 76.2±14.4     | 4.4±1.0        | 2.7±0.9         | 1.2±0.4         | 7.2±3.4             |
| Taiwan 2  | 130.2±18.0    | 74.0±11.9     | 4.5±1.0        | 2.7±0.8         | 1.1±0.4         | 6.3±1.8             |
| Taiwan 3  | 127.5±17.0    | 75.7±11.5     | 4.2±0.9        | 2.6±0.9         | 1.2±0.3         | 6.0±2.0             |
| Taiwan 4  | 135.9±18.8    | 80.6±12.7     | 4.2±1.0        | 2.7±1.0         | 1.1±0.3         | 6.6±2.2             |
| China 1   | 129.9±12.9    | 78.0±7.6      | 4.4±1.1        | 2.9±1.0         | 1.0±0.3         | 6.1±2.1             |
| China 2   | 129.3±12.6    | 77.6±8.1      | 4.4±1.1        | 2.8±1.0         | 1.0±0.2         | 5.6±1.2             |
| China 3   | 131.0±13.5    | 79.4±8.2      | 4.3±0.9        | 2.8±0.9         | 1.0±0.3         | 6.0±1.7             |
| China 4   | 130.0±13.6    | 76.4±8.8      | 4.4±1.0        | 2.8±0.9         | 1.0±0.2         | 5.7±1.3             |
| China 5   | 127.1±14.4    | 74.0±8.8      | 4.3±1.0        | 2.8±0.9         | 1.1±0.3         | 5.9±1.5             |
| China 6   | 127.0±12.0    | 76.1±8.9      | 3.9±1.0        | 2.3±0.9         | 0.9±0.3         | 5.9±1.8             |
| China 7   | 128.8±12.6    | 78.5±7.0      | 4.0±0.9        | 2.6±0.8         | 1.0±0.2         | 5.7±1.4             |
| China 8   | 130.2±12.0    | 79.0±8.9      | 4.4±0.9        | 2.8±0.8         | 1.2±0.4         | 5.6±1.3             |
| China 9   | 133.6±21.4    | 80.2±14.7     | 3.9±1.1        | 2.3±1.0         | 1.0±0.2         | 5.7±1.7             |
| China 10  | 132.3±14.2    | 78.9±9.3      | 4.6±0.9        | 2.8±0.9         | 1.6±0.4         | 7.1±1.7             |
| China 11  | 129.3±12.3    | 77.2±9.1      | 4.5±0.9        | 2.9±0.8         | 1.5±0.3         | 6.7±1.3             |

SBP: systolic blood pressure; DBP: diastolic blood pressure; TC: total cholesterol; LDL: low-density lipoprotein cholesterol; HDL: high-density lipoprotein cholesterol

Unit: mmHg for SBP and DBP; mmol/L for TC, LDL, HDL, and glucose
